# Supplementary material for: Agricultural constraints on microbial resource use and niche breadth in drainage ditches
Source: PeerJ. 2017 Dec 22;5:e4175. doi: 10.7717/peerj.4175 (PMC5742521; doi:10.7717/peerj.4175)
Supplement: Supplemental Information 1 — DECOTAB mass loss (mg) of organic matter derived from ditches adjacent to bulb fields and grasslands, incubated in ditches adjacent to both bulb fields and grasslands (n = 4). Two-way ANOVA showed significant effects of OM source (grassland ditch OM and bulb field ditch OM), but no effects of ditch type (grassland or bulb field). [file peerj-05-4175-s001.xlsx]

## Sheet: Sheet1
GrassTabs - G	BulbTabs - G	GrassTabs - B	BulbTabs - B
0.2438	0.1411	0.2691	0.1104
0.2738	0.1569	0.2727	0.1231
0.2852	0.1634	0.2738	0.1329
0.3416	0.1764	0.0857	0.1333
	0.0603	0.0905	0.0659
	0.0654	0.0964
	0.1789	0.0991
	0.1876
