# Supplementary material for: Agricultural constraints on microbial resource use and niche breadth in drainage ditches
Source: PeerJ. 2017 Dec 22;5:e4175. doi: 10.7717/peerj.4175 (PMC5742521; doi:10.7717/peerj.4175)
Supplement: Supplemental Information 2 — Microbial resource niche breadths (sqrt-Gower based nearest root distances) of microbial communities residing in both the water (A) and the sediment matrix (B) in ditches adjacent to bulb fields, grasslands, and pristine dune areas Mean (n = 6 ± sd) and corresponding letters indicate that microbial resource niche breadths are statistically similar (Gower-based NPermanova, Bonferroni-cerrected pairwise comparison, p > 005). [file peerj-05-4175-s002.xlsx]

## Sheet: Sheet1
B1-3V
0.13	1.532	1.225	0.892	0.149	1.301	0.995	0.549	0.112	1.574	1.184	0.551
1.62	0.155	1.332	1.26	1.105	0.156	1.355	0.793	1.132	0.103	1.007	1.33
1.632	0.183	0.175	0.403	1.246	0.465	0.152	0.497	1.209	0.179	0.143	0.258
1.243	2.478	1.772	1.55	1.72	1.828	1.15	1.402	1.805	1.767	0.967	1.355
1.683	1.265	0.475	0.149	1.486	1.674	0.464	0.177	0.941	1.53	0.593	0.137
1.237	0.998	0.729	0.184	1.721	0.648	0.58	0.53	1.735	1.108	0.754	1
2.081	1.305	0.165	1.122	0.719	1.244	0.179	0.179	2.189	1.066	0.307	0.183
1.362	0.637	0.233	1.199	1.854	0.438	0.887	0.43	0.539	0.371	0.195	0.918
0	1.402	1.095	0.762	0	1.152	0.846	0.4	0	1.462	1.072	0.439
1.49	0.025	1.202	1.13	0.956	0.007	1.206	0.644	1.02	-0.009	0.895	1.218
1.502	0.053	0.045	0.273	1.097	0.316	0.003	0.348	1.097	0.067	0.031	0.146
1.113	2.348	1.642	1.42	1.571	1.679	1.001	1.253	1.693	1.655	0.855	1.243
1.553	1.135	0.345	0.019	1.337	1.525	0.315	0.028	0.829	1.418	0.481	0.025
1.107	0.868	0.599	0.054	1.572	0.499	0.431	0.381	1.623	0.996	0.642	0.888
1.951	1.175	0.035	0.992	0.57	1.095	0.03	0.03	2.077	0.954	0.195	0.071
1.232	0.507	0.103	1.069	1.705	0.289	0.738	0.281	0.427	0.259	0.083	0.806
Treshold:	0.3
0	1.402	1.095	0.762	0	1.152	0.846	0.4	0	1.462	1.072	0.439
1.49	0	1.202	1.13	0.956	0	1.206	0.644	1.02	0	0.895	1.218
1.502	0	0	0	1.097	0.316	0	0.348	1.097	0	0	0
1.113	2.348	1.642	1.42	1.571	1.679	1.001	1.253	1.693	1.655	0.855	1.243
1.553	1.135	0.345	0	1.337	1.525	0.315	0	0.829	1.418	0.481	0
1.107	0.868	0.599	0	1.572	0.499	0.431	0.381	1.623	0.996	0.642	0.888
1.951	1.175	0	0.992	0.57	1.095	0	0	2.077	0.954	0	0
1.232	0.507	0	1.069	1.705	0	0.738	0	0.427	0	0	0.806
0	1.402	1.095	0.762	1.49	0	1.202	1.13	1.502	0	0	0	1.113	2.348	1.642	1.42	1.553	1.135	0.345	0	1.107	0.868	0.599	0	1.951	1.175	0	0.992	1.232	0.507	0	1.069
0	1.152	0.846	0.4	0.956	0	1.206	0.644	1.097	0.316	0	0.348	1.571	1.679	1.001	1.253	1.337	1.525	0.315	0	1.572	0.499	0.431	0.381	0.57	1.095	0	0	1.705	0	0.738	0
0	1.462	1.072	0.439	1.02	0	0.895	1.218	1.097	0	0	0	1.693	1.655	0.855	1.243	0.829	1.418	0.481	0	1.623	0.996	0.642	0.888	2.077	0.954	0	0	0.427	0	0	0.806

## Sheet: Sheet2
Trehold:	0.3																																				CMD
Veld		1	2	3	4	5	6	7	8	9	10	11	12	13	14	15	16	17	18	19	20	21	22	23	24	25	26	27	28	29	30	31	32		AMR		1	2	3	4	5	6	7	8	9	10	11	12	13
B	1	0	1.005	0.887	0.596	1.308	0	0.528	1.674	0.805	0.354	0	0.915	0.841	2.016	1.833	0.915	0.778	1.268	0	0	1.168	0.922	0.451	0	1.591	1.358	0	1.629	0.941	0.402	0.64	1.383		0.819		0	1	1	1	1	0	1	1	1	1	0	1	1
	2	0	1.212	0	1.017	1.052	0	0	1.168	1.126	0	0	0	0.855	2.346	0	1.054	0.889	1.793	0	0	1.135	0.773	0	0.487	1.994	1.014	0	0	0	0.457	0	0.358		0.585313		0	1	0	1	1	0	0	1	1	0	0	0	1
	3	0	1.517	0.967	0.68	1.626	0	0.562	0.613	0.924	0	0	0.311	0	0	1.39	1.245	1.439	1.94	0	0	1.157	0.642	0.389	0	2.145	1.017	0.363	0	1.423	0.341	0.724	0.388		0.681344		0	1	1	1	1	0	1	1	1	0	0	1	0
	4	0	0.793	0.728	0.849	1.699	0	1.03	1.136	0.838	0	0	0.652	0.639	1.957	1.291	0	1.177	1.562	0	0	1.53	0.405	0.304	0	1.967	0.95	0	0	0.97	0	0.487	0.641		0.675156		0	1	1	1	1	0	1	1	1	0	0	1	1
	5	0	1.492	1.28	1.719	1.204	0	1.103	1.817	1.238	0.682	0.802	0.508	2.052	1.631	1.274	1.352	1.793	1.51	0.642	0	1.557	1.126	0.352	0.636	2.619	0.954	0	0	2.185	0.328	0.527	0.844		1.03834		0	1	1	1	1	0	1	1	1	1	1	1	1
	6	0	1.044	1.014	0.726	1.83	0	0.535	1.058	0.936	0.58	0	0.376	1.61	1.506	1.437	1.038	0	1.747	0.378	0	1.617	0.703	0.332	0	1.687	1.332	0	0	1.56	0	1.49	0.587		0.785094		0	1	1	1	1	0	1	1	1	1	0	1	1
G	1	0	1.732	1.194	0.688	1.374	0	1.126	1.381	1.055	0	0	0	1.793	2.05	0.618	1.198	0	0.949	0	0	0.348	0	0.587	0.378	1.663	1.107	0	0	0.585	0.35	0	1.034		0.662813		0	1	1	1	1	0	1	1	1	0	0	0	1
	2	0	1.053	1.717	0.678	0.939	0	1.7	2.29	1.61	0	0	0	1.552	0.573	0	0.372	0	1.36	0	0	1.56	0	0.592	0	2.255	0.416	0	0	1.437	0	0.342	0		0.638938		0	1	1	1	1	0	1	1	1	0	0	0	1
	3	0	1.49	1.648	0.342	2.111	0	0.944	0.65	1.011	0	0	0	1.741	2.108	0	1.273	0	1.356	0.36	0	0	0	0.582	0	1.992	1.297	0	0	0.859	0	0	0.658		0.638188		0	1	1	1	1	0	1	1	1	0	0	0	1
	4	0	1.516	1.126	0	0.875	0	1.535	0.643	0.439	0	0	0	0.888	1.808	0.507	0.879	2.324	1.725	0.517	0	0	0	0	0	2.043	0.805	0	0	0	0.415	0	0.694		0.585594		0	1	1	0	1	0	1	1	1	0	0	0	1
	5	0	0	1.044	0	0.514	0	0.8	0.712	1.117	0	0	0	2.175	1.92	2.094	0.426	0.347	1.602	0.586	0	0	0.363	0.378	0	2.134	0.774	0	0	0.424	0	0	0.703		0.566031		0	0	1	0	1	0	1	1	1	0	0	0	1
	6	0	1.545	1.331	0.899	0.337	0	0.897	2.228	1.625	0.554	0	0	1.061	1.796	2.081	1.699	0	2.376	0	0	1.547	0	0	0	1.497	0.555	0	0	0.391	0	0	0.352		0.711594		0	1	1	1	1	0	1	1	1	1	0	0	1
D	1	0	1.492	1.28	1.719	0	1.044	1.014	0.726	0	0	0	0	0	0	0	0	0	1.732	1.194	0.688	0	1.053	1.717	0.678	0	1.49	1.648	0.342	0	1.516	1.126	0		0.639344		0	1	1	1	0	1	1	1	0	0	0	0	0
	2	1.204	0	1.103	1.817	1.83	0	0.535	1.058	0	0	0	0	0	0	0	0	1.374	0	1.126	1.381	0.939	0	1.7	2.29	2.111	0	0.944	0.65	0.875	0	1.535	0.643		0.722344		1	0	1	1	1	0	1	1	0	0	0	0	0
	3	1.238	0.682	0.802	0.508	0.936	0.58	0	0.376	0	0	0	0	0	0	0	0	1.055	0	0	0	1.61	0	0	0	1.011	0	0	0	0.439	0	0	0		0.288656		1	1	1	1	1	1	0	1	0	0	0	0	0
	4	0	1.402	1.095	0.762	1.49	0	1.202	1.13	1.502	0	0	0	1.113	2.348	1.642	1.42	1.553	1.135	0.345	0	1.107	0.868	0.599	0	1.951	1.175	0	0.992	1.232	0.507	0	1.069		0.863719		0	1	1	1	1	0	1	1	1	0	0	0	1
	5	0	1.152	0.846	0.4	0.956	0	1.206	0.644	1.097	0.316	0	0.348	1.571	1.679	1.001	1.253	1.337	1.525	0.315	0	1.572	0.499	0.431	0.381	0.57	1.095	0	0	1.705	0	0.738	0		0.707406		0	1	1	1	1	0	1	1	1	1	0	1	1
	6	0	1.462	1.072	0.439	1.02	0	0.895	1.218	1.097	0	0	0	1.693	1.655	0.855	1.243	0.829	1.418	0.481	0	1.623	0.996	0.642	0.888	2.077	0.954	0	0	0.427	0	0	0.806		0.743438		0	1	1	1	1	0	1	1	1	0	0	0	1
																																								anosim	r = O,2794		P0,0097
																																								Gower	0	Bulb OM	Grass OM	Dune OM
																																									Bulb OM	0	0.0309	0.0075
																																									Grass OM	0.0309	0	0.2755
																																									Dune OM	0.0075	0.2755	0
[truncated: 20 more columns]
