# Supplementary material for: Agricultural constraints on microbial resource use and niche breadth in drainage ditches
Source: PeerJ. 2017 Dec 22;5:e4175. doi: 10.7717/peerj.4175 (PMC5742521; doi:10.7717/peerj.4175)
Supplement: Supplemental Information 5 [file peerj-05-4175-s005.xlsx]

## Sheet: Sheet1
Taxon	Av. dissim	Contrib. %	Cumulative %	Mean abund. 1	Mean abund. 2	Mean abund. 3
N	2.669	10.29	10.29	0.328	2.06	1.74
carbohydrate	1.766	6.805	17.09	0.711	1.56	1.42
carbohydrate	1.692	6.519	23.61	0.518	1.54	1.76
Polymer	1.592	6.134	29.74	0.975	1.6	1.56
C-oxilc_acid	1.478	5.696	35.44	0.919	1.08	1.33
N	1.403	5.408	40.85	0.354	1.58	1.22
carbohydrate	1.305	5.029	45.88	0.484	1.2	0.648
carbohydrate	1.278	4.926	50.8	0.355	1.08	1.27
Polymer	1.235	4.757	55.56	0.165	0.908	1.46
N	1.172	4.517	60.08	0.323	0.811	0.818
C-oxilc_acid	1.134	4.368	64.45	0.568	0.622	0.683
C-oxilc_acid	1.067	4.112	68.56	0.815	1.57	1.22
Polymer	0.932	3.592	72.15	0.107	0.733	0.723
Polymer	0.8975	3.458	75.61	0.127	0.979	1.05
N	0.8842	3.407	79.01	0	0.999	0.926
C-oxilc_acid	0.8002	3.083	82.1	0.154	0.391	0.72
carbohydrate	0.7607	2.931	85.03	0	0.64	0.71
Polymer	0.6391	2.463	87.49	0.309	0.491	0.275
C-oxilc_acid	0.6181	2.382	89.87	0.129	0.83	0.726
carbohydrate	0.5844	2.252	92.13	0.54	1.27	0.529
0	0.5167	1.991	94.12	0.14	0.778	0.747
C-oxilc_acid	0.4092	1.577	95.69	0.355	0.558	0.0983
C-oxilc_acid	0.2836	1.093	96.79	0.148	0.121	0.216
N	0.1881	0.725	97.51	0.147	0	0.352
N	0.1851	0.7134	98.23	0.241	0.252	0.0567
N	0.1651	0.6361	98.86	0.277	0.117	0
carbohydrate	0.1054	0.4063	99.27	0.125	0.298	0.162
N	0.09204	0.3547	99.62	0.0792	0.186	0.278
carbohydrate	0.0579	0.2231	99.85	0	0.0795	0.0972
carbohydrate	0.02947	0.1136	99.96	0	0.0858	0
C-oxilc_acid	0.01068	0.04115	100	0	0.0517	0
C	0	0	100	0	0	0
